# Supplementary material
Source: publisher figshare collection journal article supplement (https://acs.figshare.com/ndownloader/files/12982799)
Supplement: Supplementary file 1 [file 12982799]

# Supporting Information

## Mechanism Investigation of the Post Necking Treatment to WO<sub>3</sub> Photoelectrodes

Dapeng Cao,<sup>[a,b]</sup> Jie Wang,<sup>[a]</sup> Jingbo Zhang,<sup>[a]</sup> Shuaishuai Liu,<sup>[a]</sup> Futing Xu,<sup>[a]</sup> Song  
Xu,<sup>[a]</sup> Xin Xu,<sup>[a]</sup> Baoxiu Mi, <sup>\*[a]</sup> Zhiqiang Gao<sup>\*[b]</sup>

*[a] Key Laboratory for Organic Electronics & Information Displays (KLOEID),  
Jiangsu Engineering Centre for Plate Displays & Solid State Lighting, and Institute of  
Advanced Materials (IAM), Nanjing University of Posts & Telecommunications,  
Nanjing 210023, China*

*[b] Key Laboratory of Flexible Electronics, Jiangsu National Synergetic Innovation  
Center for Advanced Materials (SICAM), School of Material Science and  
Engineering, Nanjing University of Posts & Telecommunications, Nanjing, Jiangsu  
210023, China.*

### Corresponding Author

\*E-mail: [iambxmi@njupt.edu.cn](mailto:iambxmi@njupt.edu.cn); [iamzqgao@njupt.edu.cn](mailto:iamzqgao@njupt.edu.cn).

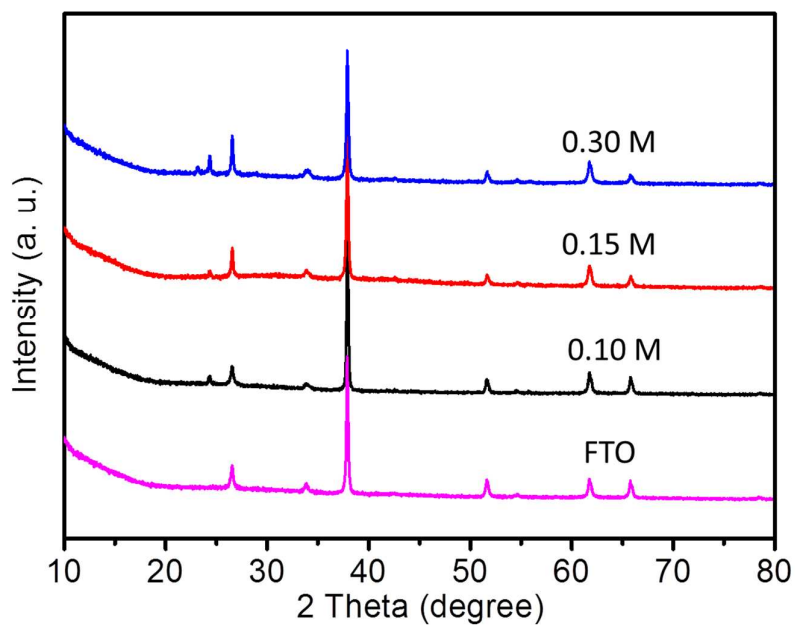

**Figure S1.** The XRD pattern of compact  $\text{WO}_3$  films on FTO prepared from different concentration of ammonium metatungstate. The diffraction pattern of a bare FTO is shown for comparison.

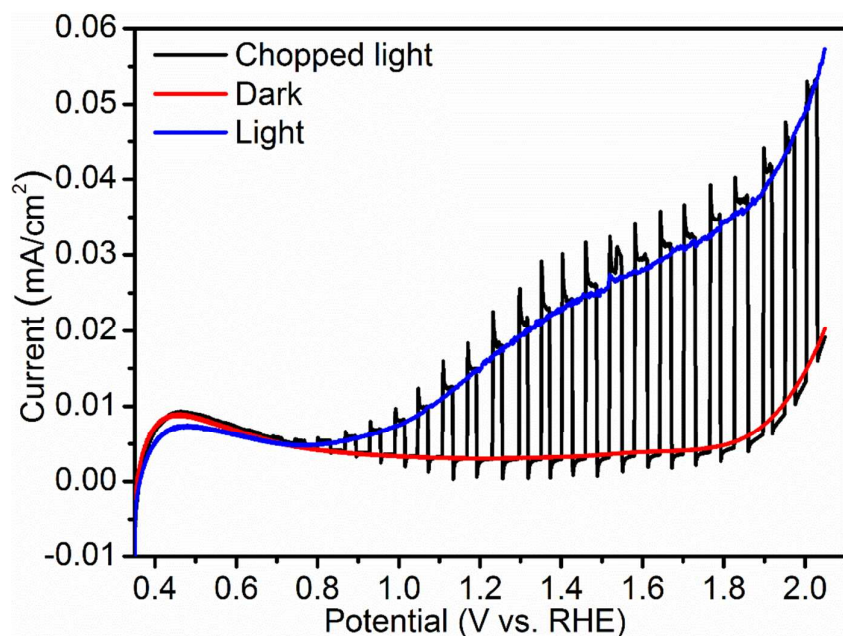

**Figure S2.** The current-potential curve of a  $\text{WO}_3$  photoanode prepared by drop ammonium metatungstate followed by annealing.

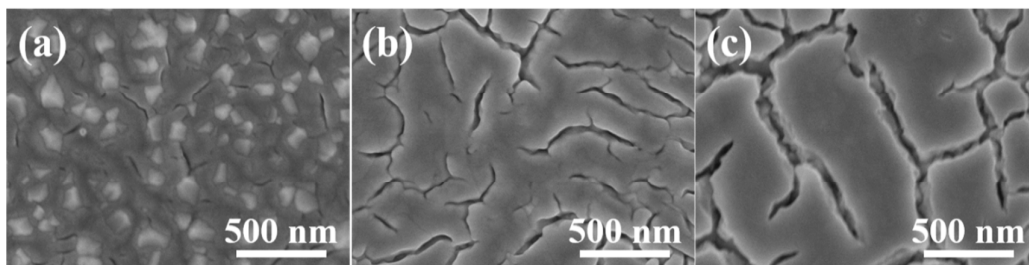

**Figure S3.** SEM images of the compact  $\text{WO}_3$  layers prepared by spin-coating ammonium metatungstate solution on FTO followed by annealing at 450 °C in air. The concentration of ammonium metatungstate solution is 0.1 M (a), 0.15 M (b) and 0.3 M (c).

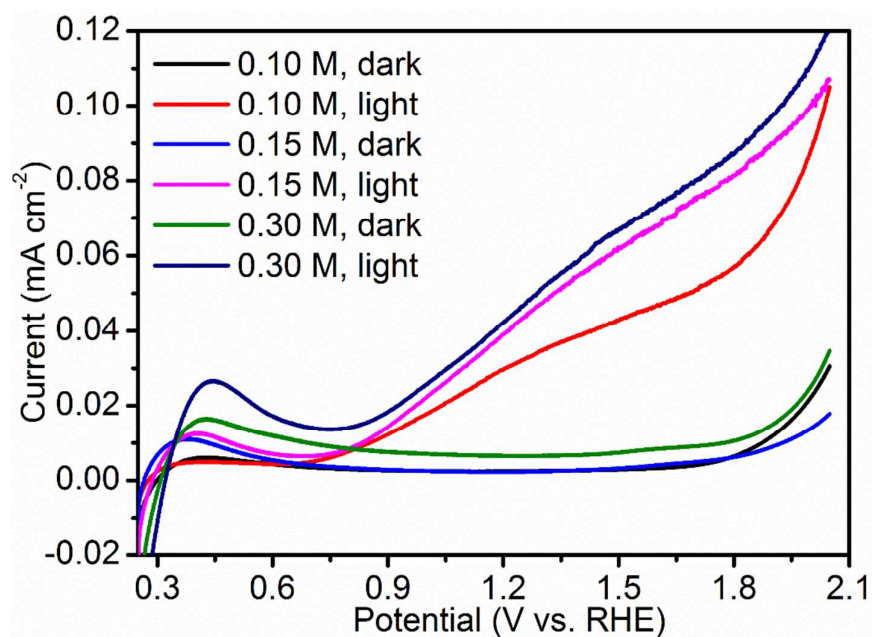

**Figure S4.** The current-potential curves of  $\text{WO}_3$  photoanodes prepared by spin-coating ammonium metatungstate solution on FTO followed by annealing at 450 °C in air.

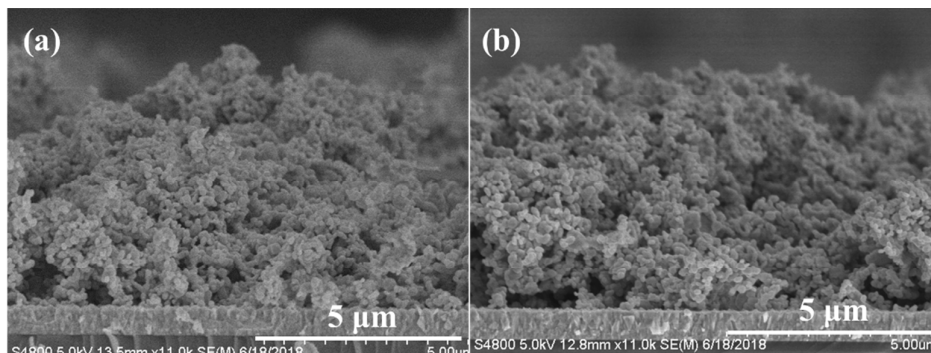

**Figure S5.** Section SEM images of the WO<sub>3</sub> films without (a) and with (b) a compact WO<sub>3</sub> layer.

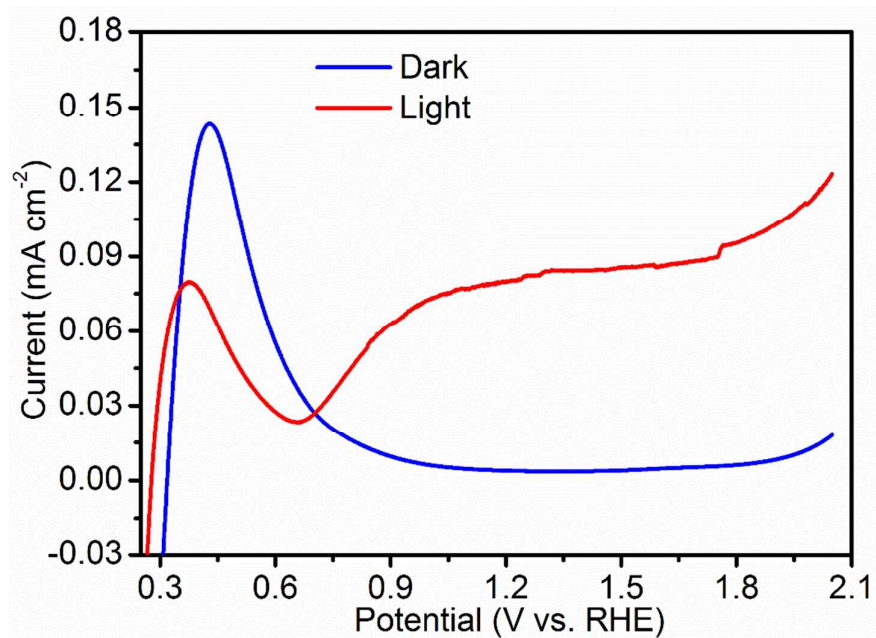

**Figure S6.** Current-potential curves of an as-deposited WO<sub>3</sub> photoanode with compact layer.

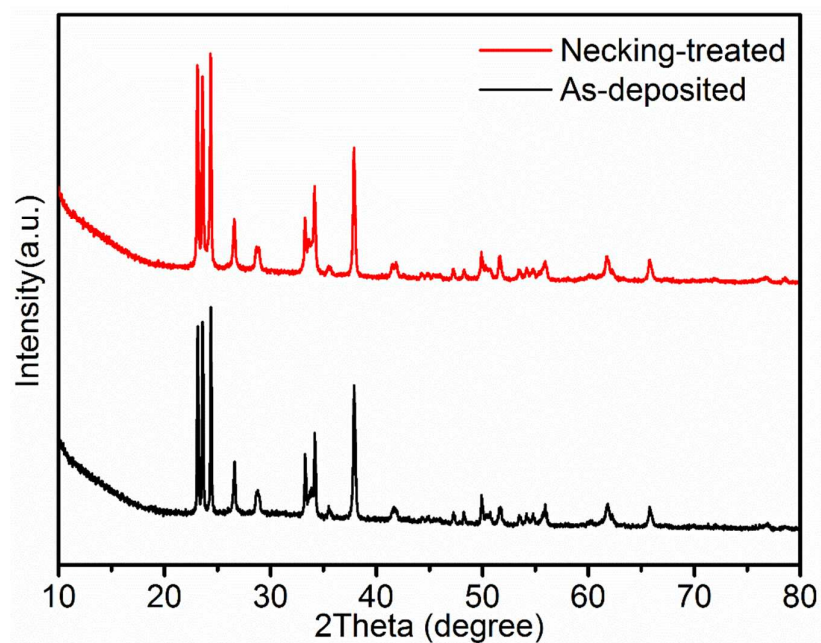

**Figure S7.** XRD pattern of as-deposited and necking-treated WO<sub>3</sub> films.

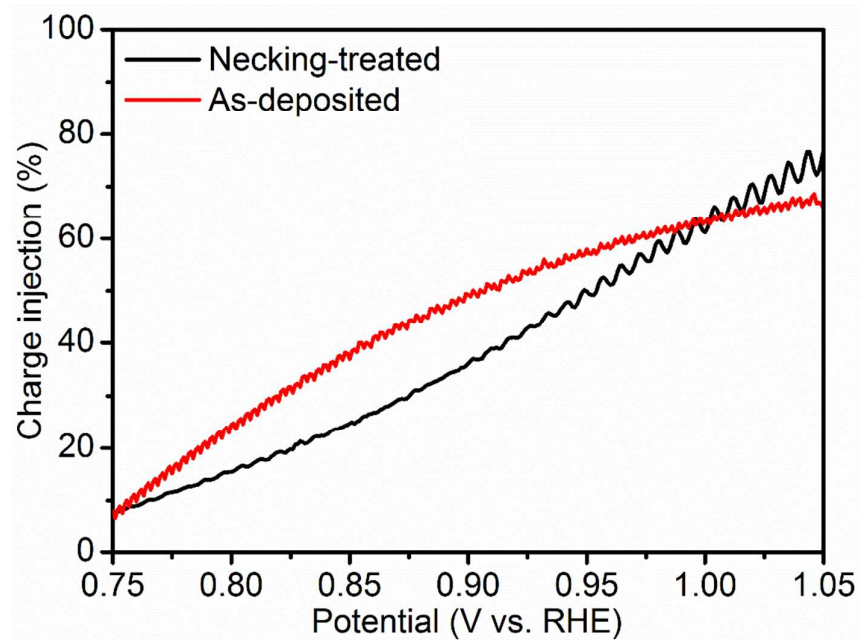

**Figure S8.** Yield of charge injection in the as-deposited  $\text{WO}_3$  photoanode and the necking-treated  $\text{WO}_3$  photoanode.

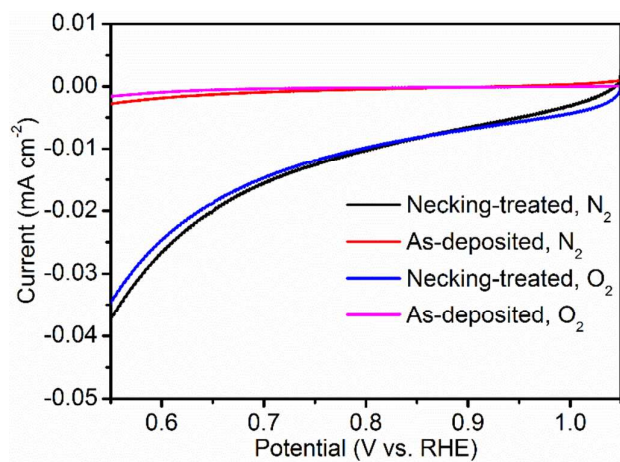

**Figure S9.** Reduction dark current on the as-deposited and necking-treated samples, electrolyte: 0.5 M  $\text{Na}_2\text{SO}_4$  with  $\text{N}_2$  or  $\text{O}_2$  bubbling.

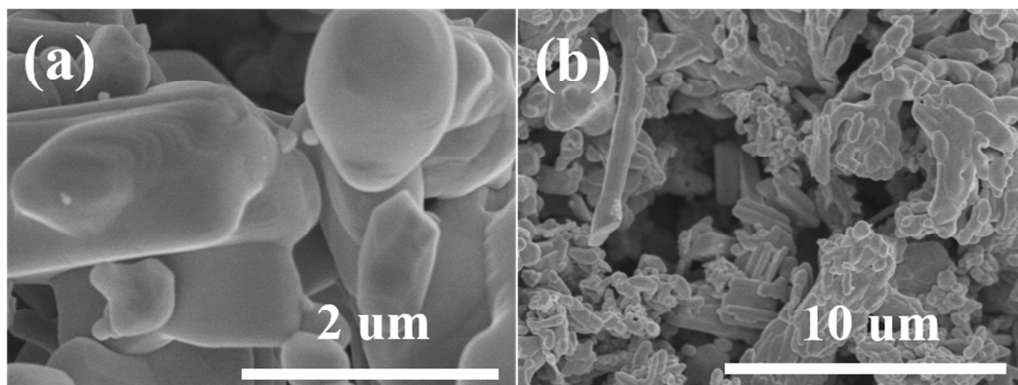

**Figure S10.** SEM images of a  $\text{WO}_3$  photoanode prepared from large  $\text{WO}_3$  particles at high (a) and low (b) magnification.

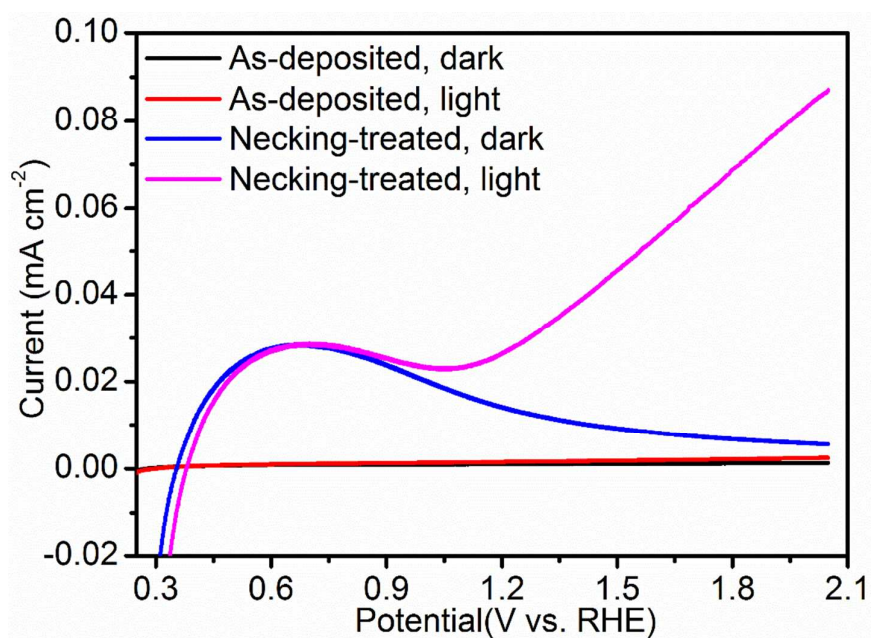

**Figure S11.** Current-potential curves of the  $\text{WO}_3$  photoanodes (prepared from large  $\text{WO}_3$  particles) without and with post necking treatment.

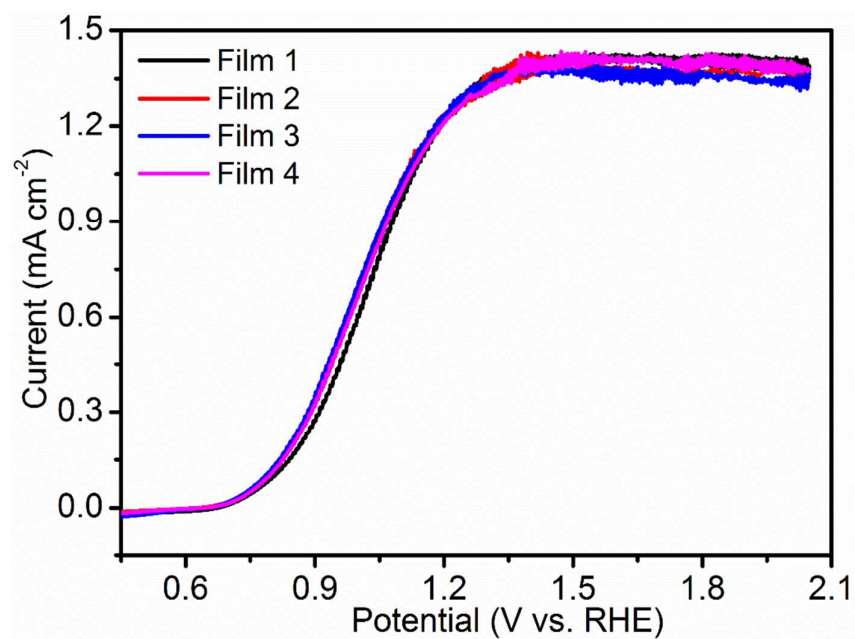

**Figure S12.** Current-potential curves of the necking-treated  $\text{WO}_3$  photoanode with underlayer in 0.5 M  $\text{Na}_2\text{SO}_4$  aqueous solution.

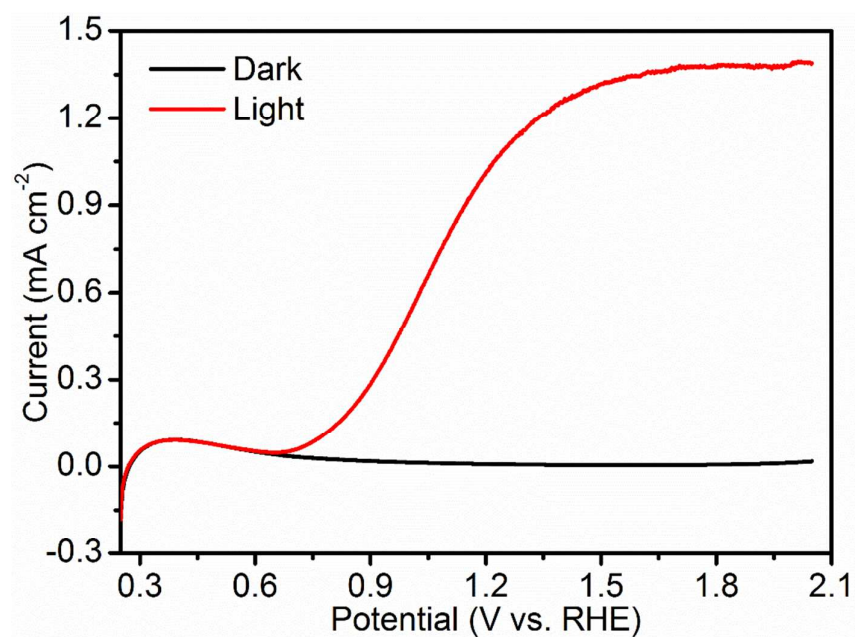

**Figure S13.** Current-potential curves of the necking-treated  $\text{WO}_3$  photoanode after  $I$ - $t$  test.

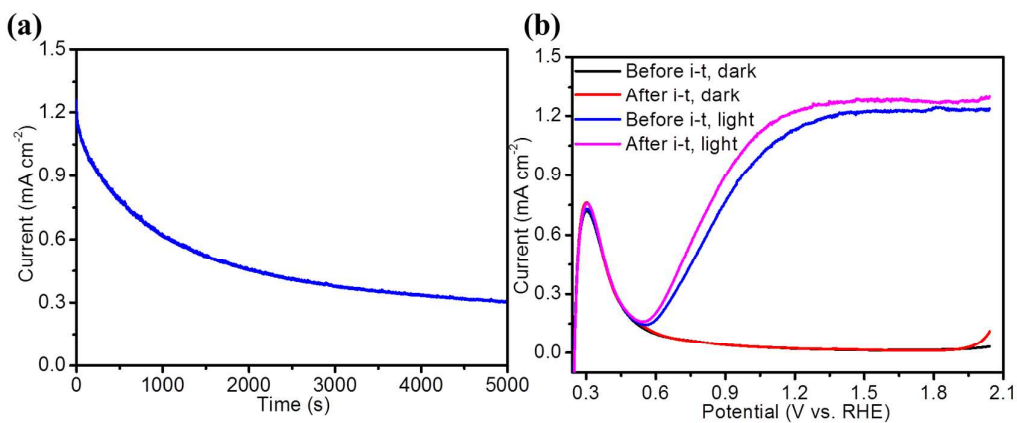

**Figure S14.** (a) *I-t* curves of the necking-treated WO<sub>3</sub> photoanode with underlayer at a potential of 1.65 V<sub>RHE</sub>, (b) *I-V* curves of the necking-treated WO<sub>3</sub> photoanode with underlayer before and after the *I-t* test, electrolyte: 0.5 M H<sub>2</sub>SO<sub>4</sub>.
